# Supplementary material for: Synthesis of poly(methyl methacrylate–methallyl alcohol) via controllable partial hydrogenation of poly(methyl methacrylate) towards high pulse energy storage capacitor application
Source: Royal Society of Chemistry journal article supplement (doi:10.1039/c6ra03757g), 2016-01-01
Supplement: c6ra03757g1.pdf [file c6ra03757g1.pdf]

Supporting information

**Synthesis of Poly(methyl methacrylate-methallyl alcohol) *via* Controllable Partial Hydrogenation of Poly(methyl methacrylate) towards High Pulse Energy Storage Capacitors Application.**

Zuochen Wang, Jingjing Liu, Honghong Gong, Xiao Zhang, Junyong Lu\*, Zhicheng Zhang\*

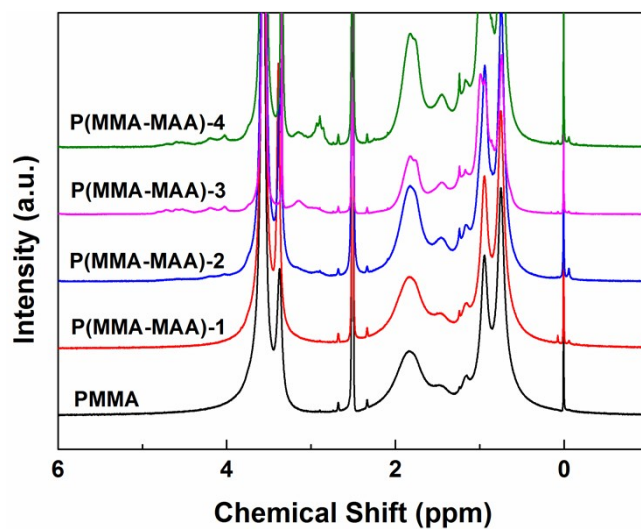

**Fig. S1** <sup>1</sup>H NMR of pristine PMMA and As-formed P(MMA-MAA) copolymers with varied MAA content.

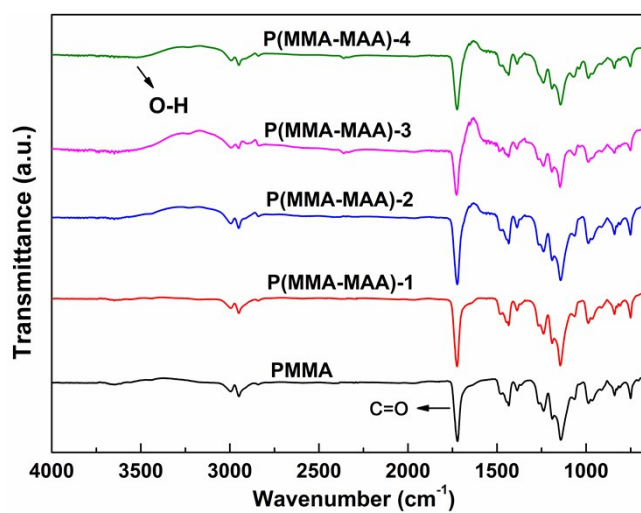

**Fig. S2** FTIR of pristine PMMA and As-formed P(MMA-MAA) copolymers with varied MAA contents.

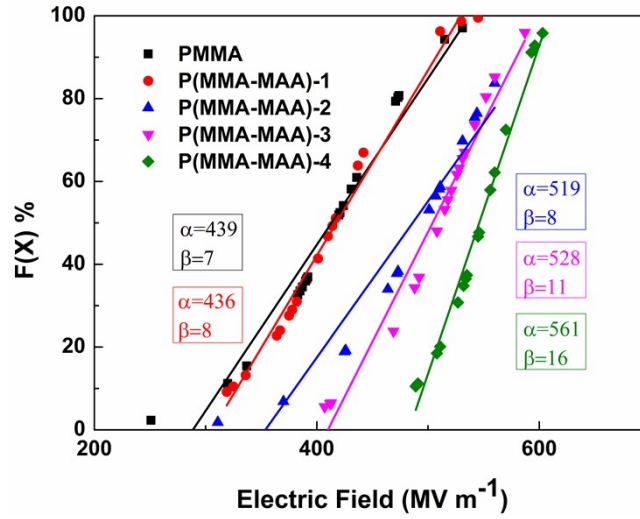

**Fig. S3** Weibull plots for pristine PMMA and As-formed P(MMA-MAA) copolymers with varied MAA contents.

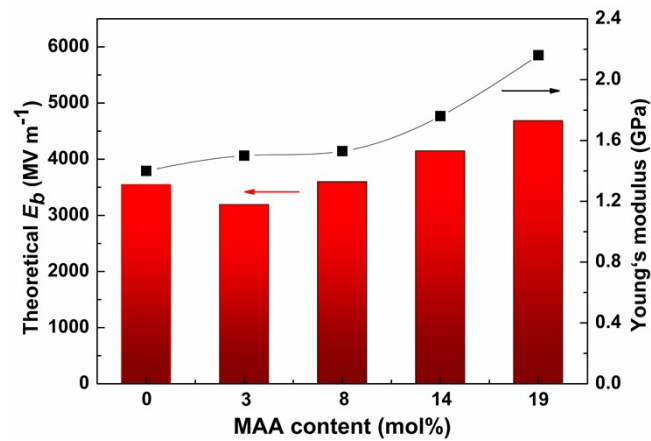

**Fig. S4** Young's modulus and theoretical data of breakdown strength calculated based on the electromechanical model of pristine PMMA and As-formed P(MMA-MAA) copolymers with varied MAOH contents.

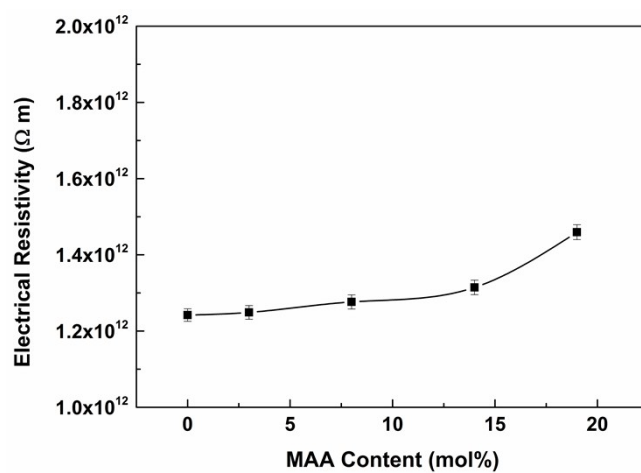

**Fig. S5** Electrical resistivity of pristine PMMA and As-formed P(MMA-MAA) copolymers with varied MAA contents under an electric field of  $50 \text{ MV m}^{-1}$ .
